# Supplementary material for: Dependence of the evolution of carbon dynamics in the northern permafrost region on the trajectory of climate change
Source: PubMed Central journal article supplement — Proc Natl Acad Sci U S A. 2018 Mar 26;115(15):3882–7. doi: 10.1073/pnas.1719903115 (PMC5899459; doi:10.1073/pnas.1719903115), 2018-03-26
Supplement: pnas.201719903SI.pdf [file pnas.201719903SI.pdf]

# Supporting Information

McGuire et al. 10.1073/pnas.1719903115

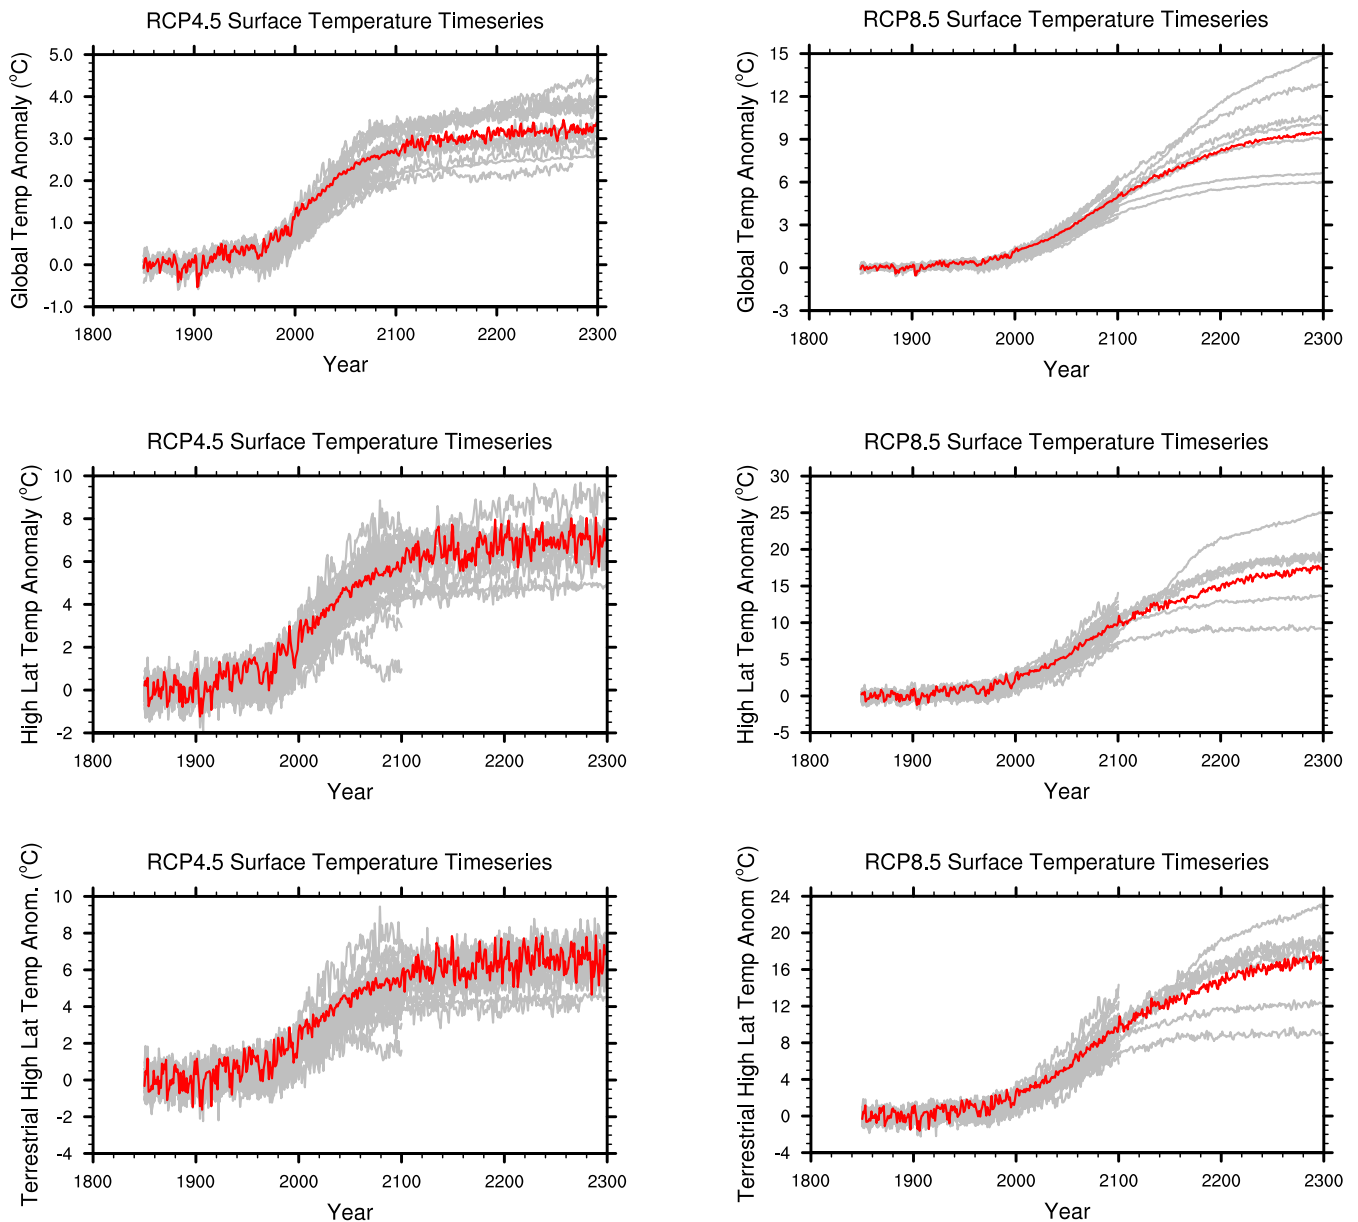

**Fig. S1.** Comparison of CCSM4 temperature anomalies to those of the CMIP5 archive. Temperature anomalies from 1850 to 2300 simulated by CCSM4 (red line) in comparison with those simulated by other models (gray lines) in the CMIP5 archive for representative concentration pathways 4.5 (RCP4.5, *Left* panels) and 8.5 (RCP8.5, *Right* panels) and for global (*Top* row), northern high latitude (*Middle* row), and terrestrial northern high latitude (*Bottom* row) spatial domains.



**Table S1. Comparison of conceptual representation of permafrost dynamics among models**

| Model   | Approach to modeling soil thermal dynamics  | Depth, m | Moss insulation considered | Organic soil insulation considered* | Snow insulation considered | Effect of unfrozen water on phase change considered <sup>†,‡</sup> |
|---------|---------------------------------------------|----------|----------------------------|-------------------------------------|----------------------------|--------------------------------------------------------------------|
| CLM4.5  | Multilayer finite difference heat diffusion | 45.1     | No                         | Yes                                 | Yes (five layers max)      | Yes                                                                |
| CoLM    | Multilayer finite difference heat diffusion | 3.4      | No                         | No                                  | Yes (five layers max)      | No                                                                 |
| JULES   | Multilayer finite difference heat diffusion | 3.0      | No                         | No                                  | Yes (three layers max)     | Yes                                                                |
| ORCHb   | 1D Fourier solution                         | 88.0     | No                         | No                                  | Yes (one layer)            | Yes                                                                |
| UVic    | Multilayer finite difference heat diffusion | 250.0    | No                         | Yes                                 | Yes (one layer)            | Yes                                                                |
| TEM6    | Multilayer finite difference heat diffusion | 36.0     | Yes                        | No                                  | Yes (one layer)            | No                                                                 |
| SiBCASA | Multilayer finite difference heat diffusion | 15.0     | No                         | Yes                                 | Yes (five layers max)      | Yes                                                                |
| GIPLb   | Multilayer finite difference heat diffusion | 200.0    | Yes                        | Yes                                 | Yes (one layer)            | Yes                                                                |

\*Organic horizon thickness is prescribed and is not prognostic.

<sup>†</sup>Model implements algorithms for representing the effects of unfrozen water on phase change processes in frozen soil.

<sup>‡</sup>In all models, soil thermal conductivity is influenced by soil moisture.

**Table S2. Comparison of conceptual representation of soil carbon dynamics among models**

| Model   | General depth, m | Soil C storage explicitly treated with depth | Moss horizon C explicitly considered | Litter horizon C explicitly considered | Organic horizon C explicitly considered | BIO C-CH <sub>4</sub> losses considered | Disturbance losses considered | Lateral losses considered | Time step of flux estimates |
|---------|------------------|----------------------------------------------|--------------------------------------|----------------------------------------|-----------------------------------------|-----------------------------------------|-------------------------------|---------------------------|-----------------------------|
| CLM4.5  | 4.0              | Yes                                          | No                                   | Yes                                    | Yes                                     | Yes                                     | Fire                          | Land use                  | 30 min                      |
| ORCHb   | 47               | Yes                                          | No                                   | Yes                                    | No                                      | No                                      | No                            | Land use                  | 30 min to 1 d               |
| UVic    | 3.35             | Yes                                          | No                                   | No                                     | Yes                                     | No                                      | No                            | Land use                  | 1 h                         |
| TEM6    | Variable to ~3   | Yes                                          | No                                   | No                                     | No                                      | Yes                                     | Yes                           | DOC export                | 1 mo                        |
| SiBCASA | 3.0              | Yes                                          | No                                   | Yes                                    | Yes                                     | Yes                                     | No                            | No                        | 30 min                      |

All models consider soil carbon losses from heterotrophic respiration.
